# Supplementary material for: Direct reuse of aluminium and copper current collectors from spent lithium-ion batteries
Source: Royal Society of Chemistry journal article supplement (doi:10.1039/d2gc03940k), 2022-12-16
Supplement: d2gc03940k1.pdf [file d2gc03940k1.pdf]

## Direct Reuse of Aluminium and Copper Current Collectors from Spent Lithium-ion Batteries

Pengcheng Zhu<sup>a, b, c\*</sup>, Elizabeth H. Driscoll<sup>b, c</sup>, Bo Dong<sup>a, c</sup>, Rob Sommerville<sup>b, c</sup>, Anton Zorin<sup>b, c</sup>, Peter R. Slater<sup>a, c\*</sup>, Emma Kendrick<sup>b, c\*</sup>

<sup>a</sup> School of Chemistry, The University of Birmingham, Birmingham, B15 2TT, United Kingdom

<sup>b</sup> School of Metallurgy and Materials, The University of Birmingham, Elms Rd, Birmingham B15 2SE, United Kingdom

<sup>c</sup> The Faraday Institution, Quad One, Harwell Campus, Didcot OX11 0RA, United Kingdom

Table 1: ICP-OES test for Al current collector in oxalic acid

| Element             | Al     | Co    | Cu | Li    | Mn     | Ni     |
|---------------------|--------|-------|----|-------|--------|--------|
| Concentration (ppm) | 109.27 | 27.01 | 0  | 26.23 | 347.93 | 109.44 |

Table 2: ICP-OES test for Cu in water

| Element             | Al   | Co   | Cu   | Li   | Mn   | Ni   | P    |
|---------------------|------|------|------|------|------|------|------|
| Concentration (ppm) | 0.04 | 0.03 | 0.04 | 6.23 | 0.07 | 0.04 | 3.28 |

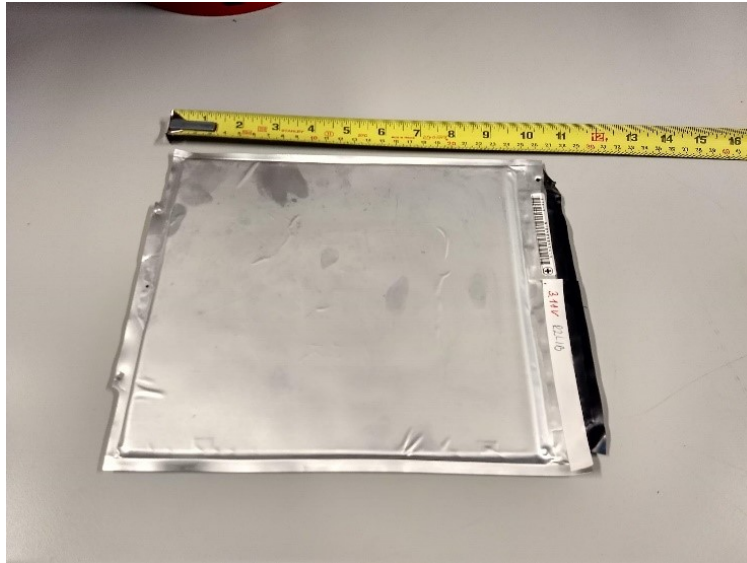

Figure S1. Spent Li-ion battery pouch cell from 1<sup>st</sup> generation Nissan Leaf.

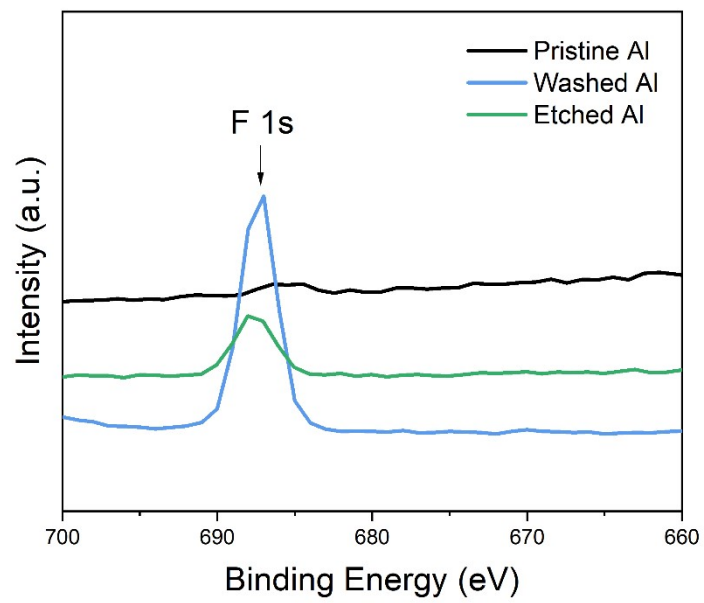

Figure S2. Zoom in XPS spectra for F 1s.

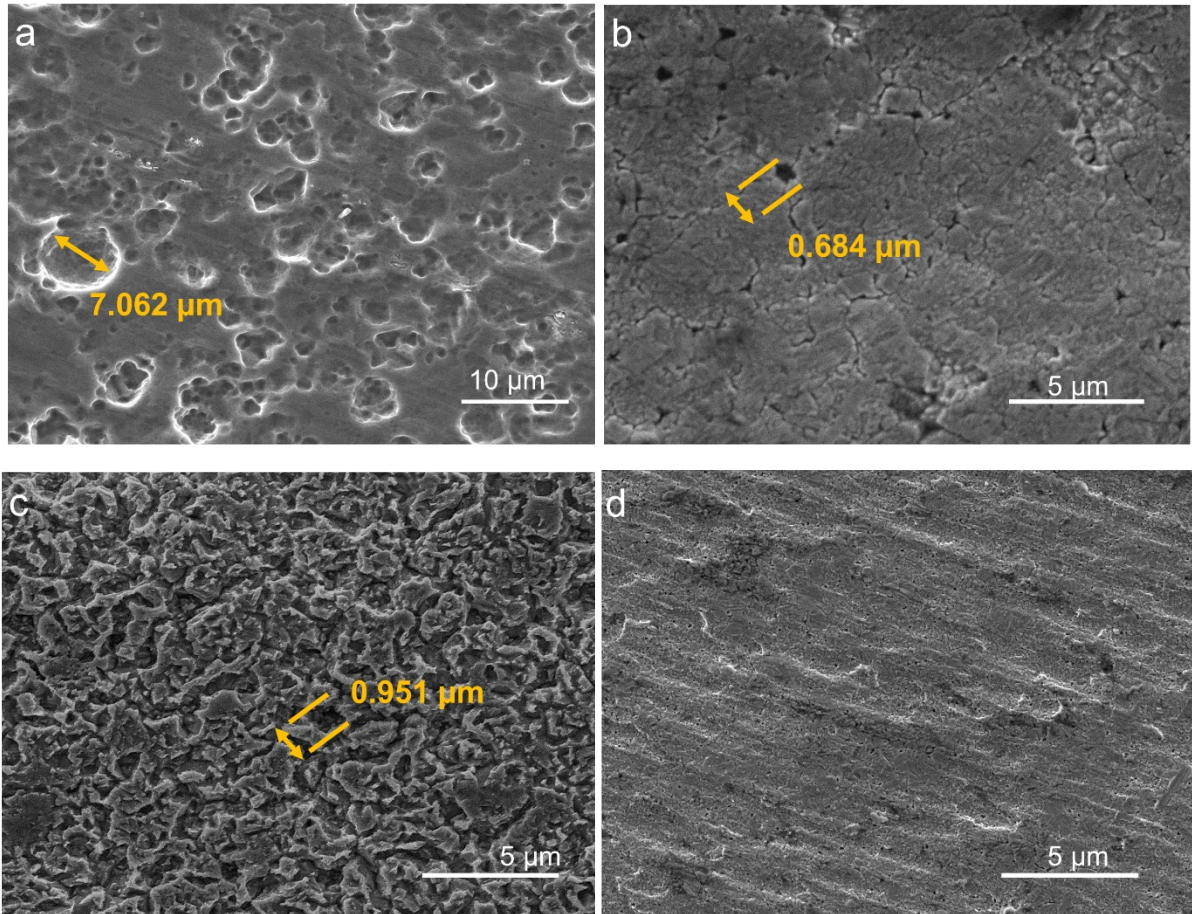

Figure S3. Surface feature size measured by images J on a) etched Al, b) washed Cu, c) etched Cu and d) pristine Cu after HNO<sub>3</sub> etching.

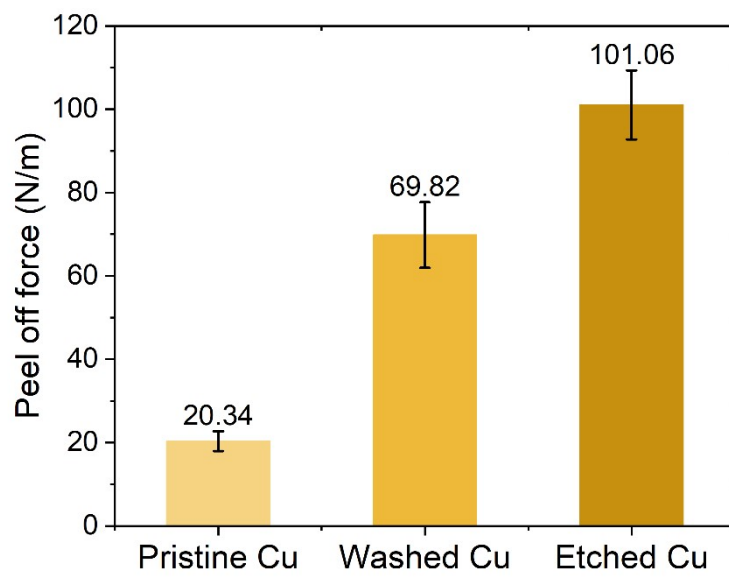

Figure S4. Adhesion force of graphite electrodes made with PVDF binder on Cu current collectors.

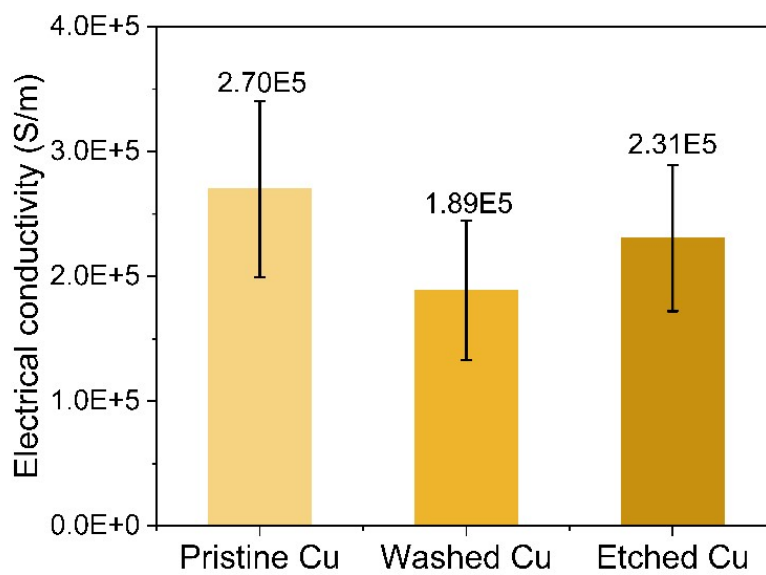

Figure S5. Electrical conductivity of graphite electrodes made with PVDF binder on Cu current collectors.

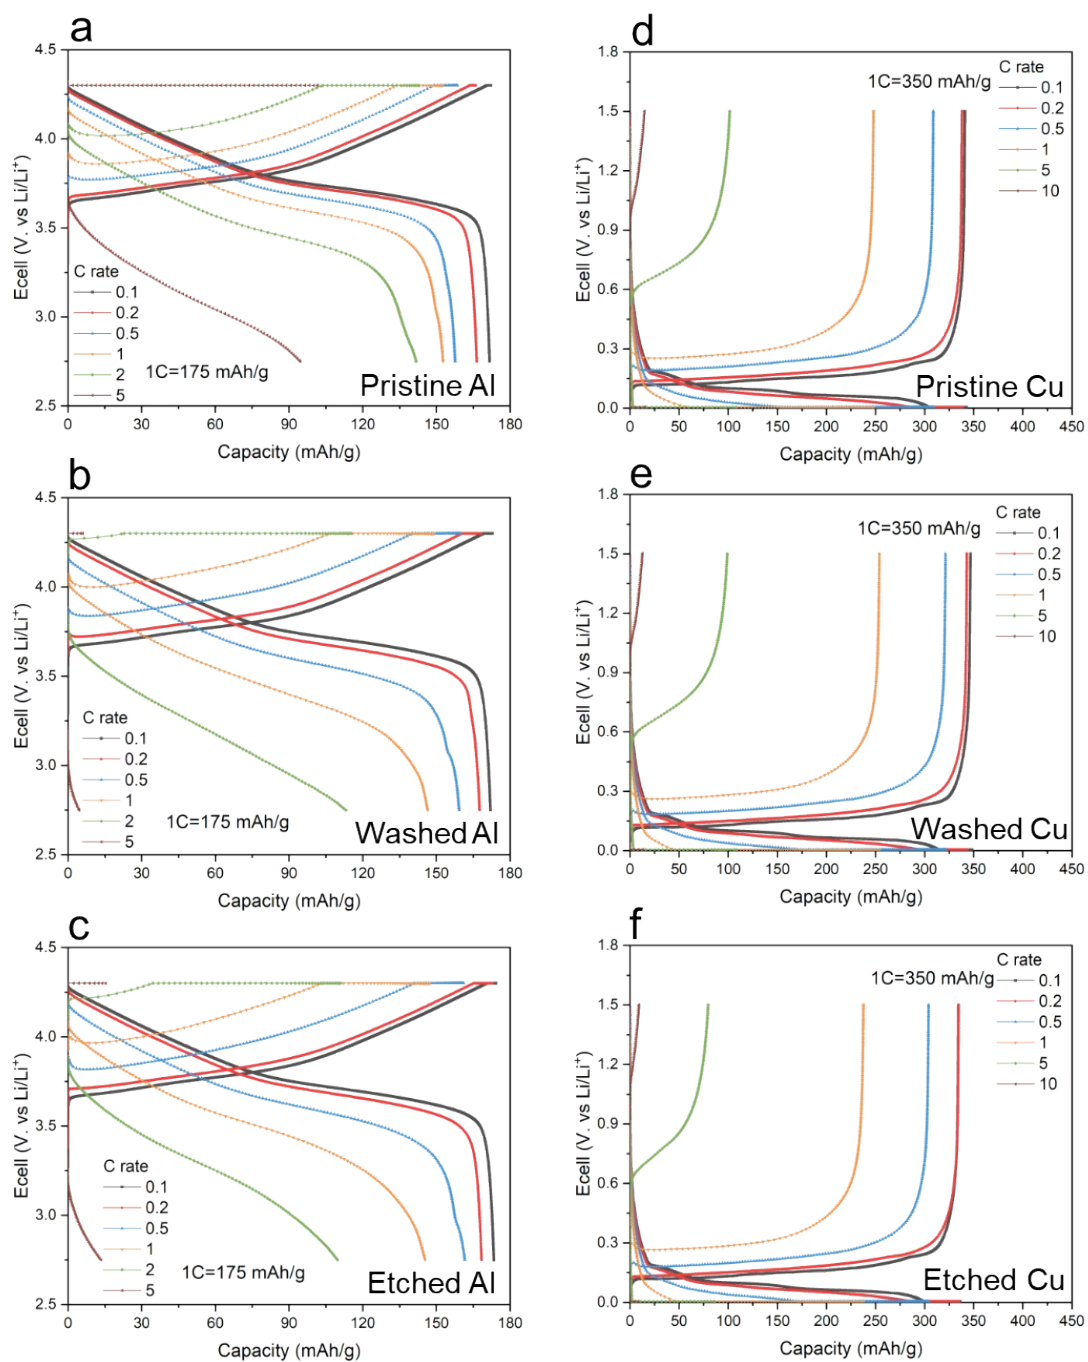

Figure S6. Charging and discharging profiles of NMC622 on Al current collectors (a-c) and graphite on Cu current collectors (d-f).

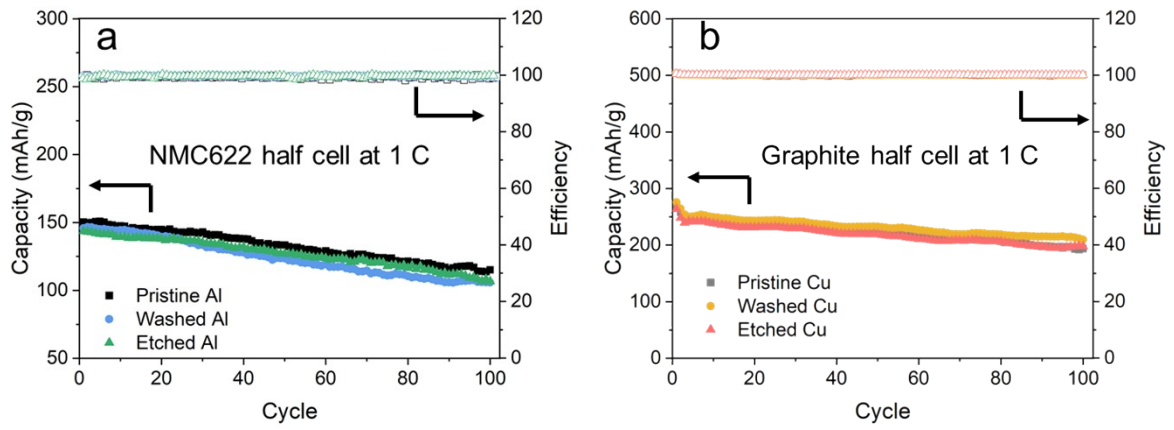

Figure S7. Cycling performance of a) NMC622 on Al current collectors and b) graphite on Cu current collectors at 1C for 100 cycles.
